# Supplementary material for: Gene Expression Profiles Suggest a Better Cold Acclimation of Polyploids in the Alpine Species Ranunculus kuepferi (Ranunculaceae)
Source: MDPI journal article supplement (doi:10.3390/genes12111818), 2021-11-18
Supplement: s1 [file s1]

# Gene expression profiles suggest a better cold acclimation of polyploids in the alpine species *Ranunculus kuepferi* (Ranunculaceae)

Eleni Syngelaki, Claudia Paetzold and Elvira Hörandl

## Supplementary Materials:

The following supplementary material is available for this article:

Table S1. List of individuals used for the laboratory work. Listed are the sample and group IDs, ploidy level, treatment, as well as country, province and altitude of origin [88, 97].

| Sample ID | Ploidy     | Temperature Treatment | Group | Country     | Region                       | Altitude (m) |
|-----------|------------|-----------------------|-------|-------------|------------------------------|--------------|
| 30_1_2    | diploid    | cold                  | CD    | Italy       | Piemonte                     | 1743         |
| 115_4_2   | diploid    | cold                  | CD    | France      | Provence-Alpes-Côte d'Azur   | 1891         |
| 116_3_1   | diploid    | cold                  | CD    | France      | Provence-Alpes-Côte d'Azur   | 1953         |
| 41_2_2    | tetraploid | cold                  | CT    | Italy       | Val d'Aosta                  | 2174         |
| 90_2_3    | tetraploid | cold                  | CT    | Switzerland | Valais                       | 2477         |
| 108_3_3   | tetraploid | cold                  | CT    | Switzerland | Graubunden                   | 2171         |
| 24_4_3    | diploid    | warm                  | WD    | France      | Provence-Alpes-Côte d'Azur   | 1925         |
| 29_1_2    | diploid    | warm                  | WD    | Italy       | Piemonte                     | 2020         |
| 33_3_3    | diploid    | warm                  | WD    | Italy       | Piemonte                     | 2328         |
| 42_1_2    | tetraploid | warm                  | WT    | Switzerland | Valais                       | 1789         |
| 74_1_2    | tetraploid | warm                  | WT    | Austria     | Osttirol                     | 2117         |
| 106_4_1   | tetraploid | warm                  | WT    | Italy       | Trentino Alto Adige/Südtirol | 2142         |

† WD: warm diploid, CD: cold diploid, WT: warm tetraploid, CT: cold tetraploid

Table S2. List of primers used for qRT-PCR validation.

| Gene ID | Sequence               |                       |
|---------|------------------------|-----------------------|
|         | Primer 5' - 3'         | Primer 3' -5'         |
| ACT     | TCTCCTTGCTCATTCTGTCG   | TTCCCTTTACGCCAGTGGTC  |
| AGO4B   | GTTGCTCTGAAACTAGAATG   | CCACCACTTCCCTTCAAC    |
| CAMT3   | CTTTCACGATTCAACACTCC   | GAACTCAGAGAAATAACAGC  |
| JM706   | AGTATGTTTGCATGGCATGTG  | TCGGAGTTTGATGGGTAGTG  |
| JMJ25   | TTCATCACTGCGCTTCCATTCC | CTTGATGTGGGCACCCTGC   |
| PMT2    | GCAGTGATTGGTGTTCCTCGG  | GTCAGACTCATCCCTACCAGG |

Table S3. Results of qRT-PCR and Delta-delta analyses.

| Hous-keeping gene |                    | Genes of interest(GOIs) |             |                         |                              |             |                         |                              |             |                         |                              |             |                         |                              |             |                         |                              |
|-------------------|--------------------|-------------------------|-------------|-------------------------|------------------------------|-------------|-------------------------|------------------------------|-------------|-------------------------|------------------------------|-------------|-------------------------|------------------------------|-------------|-------------------------|------------------------------|
|                   |                    | ACTb                    | AGO4B       |                         |                              | CAMT3       |                         |                              | JM706       |                         |                              | JM25        |                         |                              | PMT2        |                         |                              |
| Sam-ple name      | Bio-logical groups | Average Cp              | Av-erage Cp | 2 <sup>^</sup> -(ΔΔ Ct) | log[2 <sup>^</sup> -(Δ ΔCt)] | Av-erage Cp | 2 <sup>^</sup> -(ΔΔ Ct) | log[2 <sup>^</sup> -(Δ ΔCt)] | Av-erage Cp | 2 <sup>^</sup> -(ΔΔ Ct) | log[2 <sup>^</sup> -(Δ ΔCt)] | Av-erage Cp | 2 <sup>^</sup> -(ΔΔ Ct) | log[2 <sup>^</sup> -(Δ ΔCt)] | Av-erage Cp | 2 <sup>^</sup> -(ΔΔ Ct) | log[2 <sup>^</sup> -(Δ ΔCt)] |
| 30_1_2            | CD                 | 26.8                    | 21.52       | 0.63                    | -0.2                         | 35.47       | 0                       | -7.73                        | 31.83       | 0.13                    | -0.9                         | 29.1        | 0.23                    | -0.63                        | 19.39       | 1.71                    | 0.23                         |
| 115_4_2           | CD                 | 29.1                    | 19.96       | 9.13                    | 0.96                         | 38.67       | 0                       | -8                           | 32.83       | 0.31                    | -0.51                        | 29.52       | 0.85                    | -0.07                        | 21.25       | 2.32                    | 0.37                         |
| 116_3_1           | CD                 | 26.76                   | 21.72       | 0.53                    | -0.28                        | 34.88       | 0                       | -7.56                        | 32.2        | 0.09                    | -1.02                        | 31.77       | 0.04                    | -1.45                        | 20.65       | 0.69                    | -0.16                        |
| 41_2_2            | CT                 | 26.75                   | 22.54       | 0.3                     | -0.52                        | 33.63       | 0                       | -7.19                        | 35.29       | 0.01                    | -1.95                        | 31.13       | 0.05                    | -1.26                        | 20.29       | 0.88                    | -0.06                        |
| 90_2_3            | CT                 | 27.43                   | 22.77       | 0.41                    | -0.39                        | 35.04       | 0                       | -7.41                        | 31.73       | 0.21                    | -0.68                        | 30.3        | 0.16                    | -0.81                        | 20.78       | 1.01                    | 0                            |
| 108_3_3           | CT                 | 25.63                   | 22.93       | 0.11                    | -0.98                        | 34.94       | 0                       | -7.92                        | 32.33       | 0.04                    | -1.4                         | 30.89       | 0.03                    | -1.52                        | 20.3        | 0.41                    | -0.39                        |
| 24_4_3            | WD                 | 34.18                   | 23.17       | 33.16                   | 1.52                         | 0           | 148764                  | 5.17                         | 33.6        | 6.18                    | 0.79                         | 31.31       | 8.37                    | 0.92                         | 26.01       | 2.9                     | 0.46                         |
| 29_1_2            | WD                 | 30.96                   | 26.57       | 0.34                    | -0.47                        | 0           | 15920                   | 4.2                          | 32.98       | 1.02                    | 0.01                         | 31.31       | 0.89                    | -0.05                        | 24.92       | 0.66                    | -0.18                        |
| 33_3_3            | WD                 | 29.47                   | 27          | 0.09                    | -1.05                        | 43.61       | 0                       | -9.37                        | 34.18       | 0.16                    | -0.8                         | 32.56       | 0.13                    | -0.87                        | 23.76       | 0.52                    | -0.28                        |
| 42_1_2            | WT                 | 34.14                   | 27.65       | 1.44                    | 0.16                         | 33.26       | 0                       | -4.85                        | 32.99       | 9.21                    | 0.96                         | 32.39       | 3.85                    | 0.59                         | 28.71       | 0.43                    | -0.36                        |
| 74_1_2            | WT                 | 29.89                   | 25.36       | 0.37                    | -0.43                        | 37.66       | 0                       | -7.46                        | 34.21       | 0.21                    | -0.68                        | 32.54       | 0.18                    | -0.74                        | 23.3        | 0.97                    | -0.01                        |
| 106_4_1           | WT                 | 29.03                   | 23.41       | 0.79                    | -0.1                         | 37.96       | 0                       | -7.8                         | 30.94       | 1.1                     | 0.04                         | 31.11       | 0.27                    | -0.57                        | 22.53       | 0.91                    | -0.04                        |
| NTC               | --                 | 0                       | 29.51       | 0                       | -10.68                       | 0           | 0                       | -5.12                        | 30.76       | 0                       | -8.64                        | 31.14       | 0                       | -9.32                        | 39.08       | 0                       | -13.76                       |

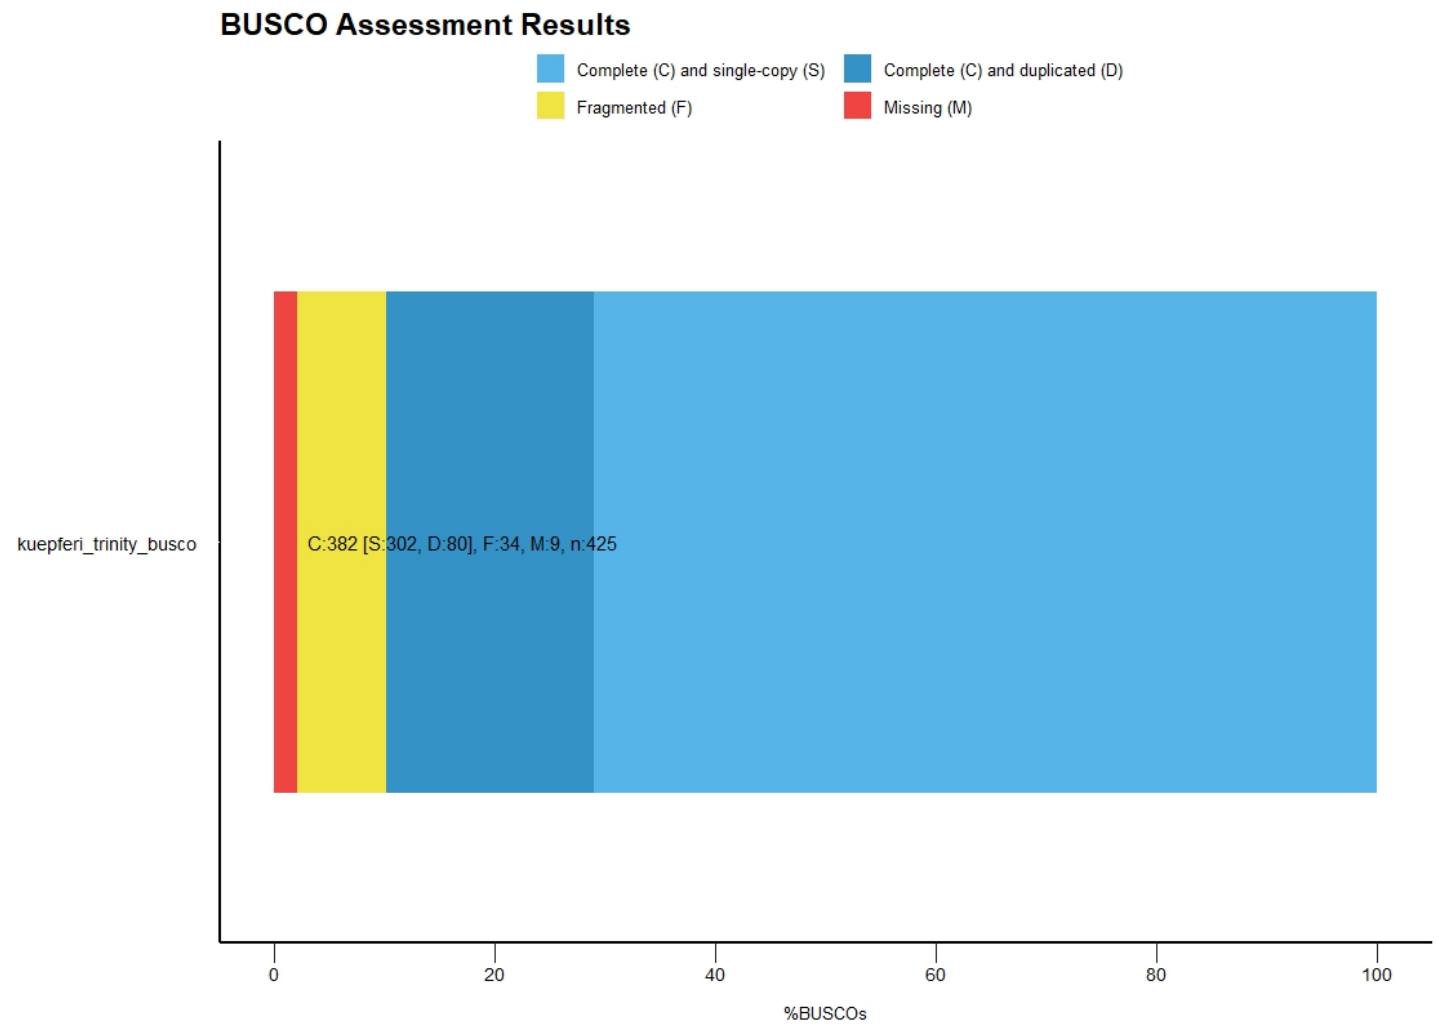

Figure S1. BUSCO (Benchmarking Universal Single-Copy Orthologs) plot of the *R. kuepferi* transcriptome pseudoreference.

1  
2  
3

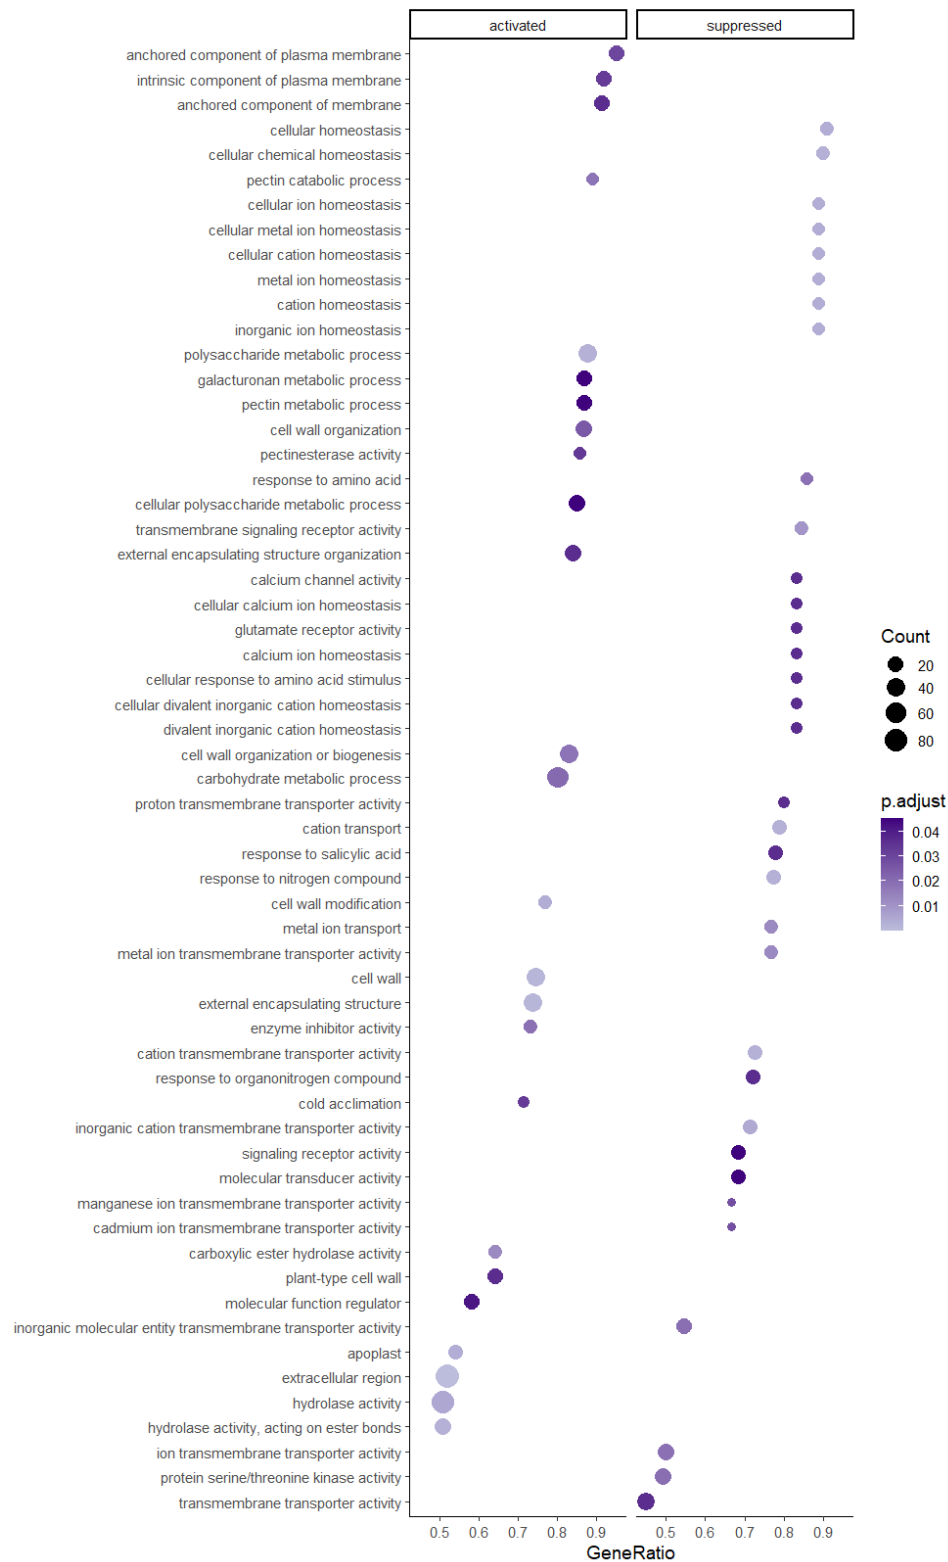

Figure S2. All Gene set pathways significantly enriched from the analysis of differentially expressed genes in diploid individuals of *R. kuepferi*.
